# Supplementary material for: Parallel diversifications of Cremastosperma and Mosannona (Annonaceae), tropical rainforest trees tracking Neogene upheaval of South America
Source: PubMed Central journal article supplement (PMC5792937; doi:10.1098/rsos.171561), 2018-01-31
Supplement: rsos171561supp1.pdf [file rsos171561supp1.pdf]

Appendix 1: Accession details for samples used in phylogenetic analyses, with GenBank accession numbers. Malate synthase was sequenced in two non-overlapping parts that have been given separate GenBank accession numbers.

| Species                                                          | Collection          | Country    | <i>matK</i> | <i>ndhF</i> | <i>rbcl</i> | <i>atpB-rbcl</i> | <i>psbA-trnH</i> | <i>trnTL</i> | <i>trnLF</i>         | <i>pseudtrnLF</i> | malate synthase      | PHYC     |
|------------------------------------------------------------------|---------------------|------------|-------------|-------------|-------------|------------------|------------------|--------------|----------------------|-------------------|----------------------|----------|
| <i>Annickia pilosa</i> (Exell) Setten & Maas                     | Sosef 1803 (WAG)    | Gabon      | AY743488    | AY841402    | AY743450    | AY841371         | AY841444         | AY841572     | AY743469             | —                 | —                    | —        |
| <i>Klarobelia inundata</i> Chatrou                               | Chatrou 205 (U)     | Peru       | AY743490    | AY841409    | AY743452    | AY841378         | AY841469         | AY841577     | AY743471             | —                 | —                    | —        |
| <i>Klarobelia stipitata</i> Chatrou                              | Chatrou 113 (U)     | Costa Rica | —           | —           | AY841628    | —                | AY841472         | —            | AY841706             | —                 | —                    | —        |
| <i>Ephedranthus parviflorus</i> S.Moore                          | Prance 19246 (U)    | Brazil     | —           | —           | AY841615    | —                | AY841462         | —            | AY841693             | —                 | —                    | MG680677 |
| <i>Ephedranthus</i> sp.                                          | Maas 8826 (U)       | Brazil     | AY841396    | AY841407    | AY841616    | AY841376         | AY841463         | AY841575     | AY841694             | —                 | —                    | —        |
| <i>Malmea dielsiana</i> R.E.Fr.                                  | Chatrou 122 (U)     | Peru       | AY238964    | AY841410    | AY238955    | AY841379         | AY841473         | AY841578     | AY231288<br>AY238948 | DQ018195          | —                    | MG680678 |
| <i>Malmea</i> sp.                                                | Chatrou 8 (U)       | Peru       | AY841397    | AY841411    | AY841527    | AY841380         | AY841475         | AY841579     | AY841541             | DQ018196          | —                    | —        |
| <i>Onychopetalum periquino</i> (Rusby) D.M.Johnson & N.A. Murray | Chatrou 425 (U)     | Bolivia    | AY518876    | AY841414    | AY319065    | AY841383         | AY841485         | AY841582     | AY319179             | —                 | —                    | —        |
| <i>Oxandra macrophylla</i> R.E.Fr.                               | Chatrou 204 (U)     | Peru       | —           | —           | AY841642    | —                | AY841491         | —            | AY841720             | —                 | —                    | MG680679 |
| <i>Oxandra venezuelana</i> R.E.Fr.                               | Chatrou 120 (U)     | Costa Rica | —           | —           | AY841645    | —                | AY841495         | —            | AY841723             | —                 | —                    | MG680680 |
| <i>Pseudomalmea diclina</i> (R.E.Fr.) Chatrou                    | Chatrou 211 (U)     | Peru       | AY841398    | AY841419    | AY319068    | AY841388         | AY841506         | —            | AY319128             | —                 | MG680649<br>MG680658 | MG680681 |
| <i>Pseudoxandra lucida</i> R.E.Fr.                               | Chatrou 212/213 (U) | Peru       | AY518870    | AY841420    | AY319076    | AY841389         | AY841510         | AY841588     | AY319190             | —                 | —                    | —        |
| <i>Pseudoxandra spiritus-sancti</i> Maas                         | Maas 8833 (U)       | Brazil     | AY841399    | AY841421    | AY841533    | AY841390         | AY841513         | AY841589     | AY841547             | —                 | —                    | —        |

| Species                                             | Collection                          | Country       | <i>matK</i> | <i>ndhF</i> | <i>rbcl</i> | <i>atpB-rbcl</i> | <i>psbA-trnH</i> | <i>trnTL</i> | <i>trnLF</i> | <i>pseudtrnLF</i> | malate synthase | PHYC     |
|-----------------------------------------------------|-------------------------------------|---------------|-------------|-------------|-------------|------------------|------------------|--------------|--------------|-------------------|-----------------|----------|
| <i>Sapranthus viridiflorus</i><br>G.E.Schatz        | Chatrou 55 (U)                      | Costa Rica    | AY743493    | AY841422    | AY319051    | AY841391         | AY841515         | AY841590     | AY319165     | —                 | —               | —        |
| Unknown genus                                       | Tello 3416 (NY)                     | Peru          | AY841520    | —           | —           | —                | AY841456         | —            | AY841534     | —                 | —               | —        |
| <i>Crematosperma brevipes</i><br>(DC) R.E.Fr.       | Scharf 76 (U)                       | French Guiana | AY743550    | AY841405    | AY743527    | AY841374         | AY841447         | AY841573     | AY743573     | DQ018191          | —               | MG680676 |
| <i>Crematosperma bullatum</i><br>Pirie              | Pirie 71 (U)                        | Peru          | AY743560    | DQ018140    | AY743537    | —                | AY841459         | DQ018170     | AY743583     | DQ018220          | —               | —        |
| <i>Crematosperma bullatum</i><br>Pirie              | Pirie 94 (U)                        | Peru          | DQ018276    | DQ018142    | DQ018235    | —                | DQ018256         | DQ018172     | DQ018188     | DQ018221          | —               | —        |
| <i>Crematosperma cauliflorum</i><br>R.E.Fr.         | Maas 9029 (U)                       | Peru          | AY743548    | DQ018125    | AY743525    | —                | DQ018240         | DQ018150     | AY743571     | DQ018206          | —               | —        |
| <i>Crematosperma cauliflorum</i><br>R.E.Fr.         | Chatrou 224 (U)                     | Peru          | AY743542    | AY841406    | AY743519    | AY841375         | AY841448         | AY841574     | AY743565     | DQ018192          | —               | —        |
| <i>Crematosperma gracilipes</i><br>R.E.Fr.          | Chatrou 267 (U)                     | Ecuador       | AY743544    | —           | AY743521    | —                | —                | —            | AY743567     | —                 | —               | —        |
| <i>Crematosperma leiophyllum</i><br>(Diels) R.E.Fr. | Pirie 2 (U)                         | Bolivia       | AY743546    | DQ018123    | AY743523    | —                | AY841449         | DQ018148     | AY743569     | DQ018193          | —               | —        |
| <i>Crematosperma longicuspe</i><br>R.E.Fr.          | Woytkowski 7128<br>(GH, MO, UC, US) | Peru          | MG680703    | MG680667    | MG649385    | —                | MG680710         | MG649386     | MG680725     | MG649387          | —               | —        |
| <i>Crematosperma monospermum</i><br>(Rusby) R.E.Fr. | Killip 28691 (US,<br>F, NY)         | Peru          | AY743566    | —           | AY743533    | —                | —                | —            | AY743579     | —                 | —               | —        |
| <i>Crematosperma macrocarpum</i><br>Maas            | Wingfield 6751<br>(U)               | Venezuela     | AY743551    | DQ018129    | AY743528    | —                | AY841450         | DQ018154     | AY743574     | DQ018194          | —               | —        |
| <i>Crematosperma magdalenae</i><br>Pirie            | Escobar 3309 (U)                    | Colombia      | DQ018279    | DQ018143    | AY841521    | —                | AY841460         | DQ018174     | AY841535     | —                 | —               | —        |
| <i>Crematosperma megalophyllum</i>                  | Maas 8595 (U)                       | Ecuador       | AY743540    | —           | AY743517    | —                | —                | —            | AY743563     | —                 | —               | —        |

| Species                                              | Collection         | Country  | <i>matK</i> | <i>ndhF</i> | <i>rbcl</i> | <i>atpB-rbcL</i> | <i>psbA-trnH</i> | <i>trnTL</i> | <i>trnLF</i> | <i>pseudtrnLF</i> | malate synthase | PHYC |
|------------------------------------------------------|--------------------|----------|-------------|-------------|-------------|------------------|------------------|--------------|--------------|-------------------|-----------------|------|
| R.E.Fr.                                              |                    |          |             |             |             |                  |                  |              |              |                   |                 |      |
| <i>Crematosperma megalophyllum</i><br>R.E.Fr.        | Chatrou 268 (U)    | Ecuador  | AY743543    | DQ018121    | AY743520    | —                | DQ018239         | DQ018146     | AY743566     | —                 | —               | —    |
| <i>Crematosperma megalophyllum</i><br>R.E.Fr.        | Chatrou 259 (U)    | Ecuador  | AY743545    | DQ018122    | AY743522    | —                | AY841451         | DQ018147     | AY743568     | —                 | —               | —    |
| <i>Crematosperma microcarpum</i><br>R.E.Fr.          | Maas 8289 (U)      | Peru     | AY743539    | —           | AY743516    | —                | —                | —            | AY743562     | —                 | —               | —    |
| <i>Crematosperma microcarpum</i><br>R.E.Fr.          | Chatrou 208 (U)    | Peru     | AY518874    | DQ018120    | AY319058    | —                | AY841452         | DQ018145     | AY319172     | DQ018204          | —               | —    |
| <i>Crematosperma monospermum</i><br>(Rusby) R.E.Fr.  | Pirie 4 (U)        | Bolivia  | AY743547    | DQ018124    | AY743524    | —                | AY841453         | DQ018149     | AY743570     | DQ018205          | —               | —    |
| <i>Crematosperma napoense</i><br>Pirie               | Neil 7649 (U)      | Ecuador  | DQ018265    | DQ018127    | DQ018224    | —                | DQ018242         | DQ018152     | DQ018177     | DQ018208          | —               | —    |
| <i>Crematosperma novogranatense</i><br>R.E.Fr.       | Devia 5335 (MO)    | Colombia | AY743552    | —           | AY743529    | —                | —                | DQ018156     | AY743529     | —                 | —               | —    |
| <i>Crematosperma oblongum</i><br>R.E.Fr.             | Maas 9148 (U)      | Brazil   | AY743549    | DQ018126    | AY743526    | —                | DQ018241         | DQ018151     | AY743572     | DQ018207          | —               | —    |
| <i>Crematosperma oblongum</i><br>R.E.Fr.             | Morawetz 25985 (U) | Peru     | DQ018266    | DQ018128    | DQ018225    | —                | DQ018243         | DQ018153     | DQ018178     | DQ018209          | —               | —    |
| <i>Crematosperma oblongum</i><br>R.E.Fr.             | Pirie 7 (U)        | Peru     | DQ018273    | DQ018137    | DQ018232    | —                | DQ018253         | DQ018165     | DQ018185     | DQ018215          | —               | —    |
| <i>Crematosperma panamense</i><br>Maas               | Miller 947 (U)     | Panama   | AY743553    | DQ018131    | AY743530    | —                | DQ018246         | DQ018158     | AY743576     | DQ018211          | —               | —    |
| <i>Crematosperma pedunculatum</i><br>(Diels) R.E.Fr. | Gentry 80904 (U)   | Peru     | DQ018269    | —           | DQ018228    | —                | DQ018248         | DQ018161     | DQ018181     | —                 | —               | —    |
| <i>Crematosperma pedunculatum</i><br>(Diels) R.E.Fr. | Gentry 45510 (U)   | Peru     | AY743561    | DQ018135    | AY743538    | —                | DQ018251         | DQ018165     | AY743584     | DQ018215          | —               | —    |

| Species                                             | Collection            | Country    | <i>matK</i> | <i>ndhF</i> | <i>rbcl</i> | <i>atpB-rbcl</i> | <i>psbA-trnH</i> | <i>trnTL</i> | <i>trnLF</i> | <i>pseudtrnLF</i> | malate synthase      | PHYC     |
|-----------------------------------------------------|-----------------------|------------|-------------|-------------|-------------|------------------|------------------|--------------|--------------|-------------------|----------------------|----------|
| <i>Crematosperma pendulum</i> (Ruiz & Pav.) R.E.Fr. | Morawetz 9888 (U)     | Peru       | AY743554    | —           | AY743531    | —                | DQ018247         | DQ018159     | AY743577     | —                 | —                    | —        |
| <i>Crematosperma pendulum</i> (Ruiz & Pav.) R.E.Fr. | Graham 635 (U)        | Peru       | AY743555    | DQ018132    | AY743532    | —                | AY841454         | DQ018160     | AY743578     | DQ018212          | —                    | —        |
| <i>Crematosperma pendulum</i> (Ruiz & Pav.) R.E.Fr. | Pirie 33 (U)          | Peru       | DQ018274    | DQ018138    | DQ018233    | —                | DQ018254         | DQ018168     | DQ018186     | DQ018218          | —                    | —        |
| <i>Crematosperma peruvianum</i>                     | Rodríguez 1112 (U)    | Peru       | AY743557    | —           | AY743534    | —                | —                | —            | AY743580     | —                 | —                    | —        |
| <i>Crematosperma</i> sp.                            | Barbosa 8008 (COL)    | Colombia   | MG649388    | —           | MG649389    | —                | MG680711         | MG649390     | MG649391     | —                 | —                    | —        |
| <i>Crematosperma</i> aff. sp. B                     | Foster 3418 (US)      | Peru       | DQ018271    | —           | DQ018230    | —                | DQ018250         | DQ018164     | DQ018183     | —                 | —                    | —        |
| <i>Crematosperma stenophyllum</i> Pirie             | Knapp 6159 (COL)      | Ecuador    | MG680642    | MG680643    | MG680644    | —                | MG680645         | MG680646     | MG680647     | MG680648          | —                    | —        |
| <i>Crematosperma venezuelanum</i> Pirie             | Steyermark 94314 (NY) | Venezuela  | AY743559    | DQ018134    | AY743536    | —                | AY841457         | DQ018163     | AY743582     | DQ018214          | —                    | —        |
| <i>Crematosperma westrae</i> Pirie                  | Oliver 3681 (MO)      | Panama     | DQ018272    | DQ018136    | DQ018231    | —                | DQ018252         | DQ018166     | DQ018184     | DQ018216          | —                    | —        |
| <i>Crematosperma yamayakatense</i> Pirie            | Vásquez 19055 (U)     | Peru       | DQ018267    | —           | DQ018226    | —                | DQ018244         | DQ018155     | DQ018187     | —                 | —                    | —        |
| <i>Crematosperma yamayacatense</i> Pirie            | Pirie 57 (U)          | Peru       | AY743558    | DQ018139    | AY743535    | —                | AY841458         | DQ018169     | AY743581     | DQ018219          | —                    | —        |
| <i>Crematosperma yamayakatense</i> Pirie            | Pirie 80 (U)          | Peru       | DQ018275    | DQ018141    | DQ018234    | —                | DQ018255         | DQ018171     | DQ018179     | —                 | —                    | —        |
| <i>Mosannona costaricensis</i> (R.E.Fr.) Chatrou    | Chatrou 90 (U)        | Costa Rica | AY743503    | AY841413    | AY743510    | AY841382         | AY841479         | —            | AY743496     | —                 | MG680650<br>MG680659 | MG680683 |
| <i>Mosannona costaricensis</i> (R.E.Fr.) Chatrou    | Chatrou 91 (U)        | Costa Rica | MG680704    | —           | MG680719    | —                | MG680712         | —            | MG680726     | —                 | —                    | MG680684 |

| Species                                                                     | Collection             | Country    | <i>matK</i> | <i>ndhF</i> | <i>rbcl</i> | <i>atpB-rbcL</i> | <i>psbA-trnH</i> | <i>trnTL</i> | <i>trnLF</i> | <i>pseudtrnLF</i> | malate synthase      | PHYC     |
|-----------------------------------------------------------------------------|------------------------|------------|-------------|-------------|-------------|------------------|------------------|--------------|--------------|-------------------|----------------------|----------|
| <i>Mosannona depressa</i> (Baill.) Chatrou subsp. <i>abscondita</i> Chatrou | Vester s.n. (U)        | Mexico     | MG680706    | #           | MG680721    | MG680696         | MG680714         | —            | MG680728     | —                 | MG680652<br>MG680661 | MG680685 |
| <i>Mosannona depressa</i> (Baill.) Chatrou subsp. <i>depressa</i>           | Calzada 1560 (U)       | Mexico     | MG680705    | MG680668    | MG680720    | MG680695         | MG680713         | —            | MG680727     | —                 | MG680651<br>MG680660 | MG680686 |
| <i>Mosannona discolor</i> (R.E.Fr.) Chatrou                                 | Jansen-Jacobs 6000 (U) | Surinam    | AY743504    | MG680669    | AY743511    | MG680697         | AY841480         | —            | AY743497     | —                 | MG680653<br>MG680662 | MG680687 |
| <i>Mosannona garwoodii</i> Chatrou & Welzenis                               | Garwood 3129 (U)       | Panama     | AY743505    | MG680670    | AY743512    | MG680698         | AY841481         | —            | AY743498     | —                 | MG680654<br>MG680663 | MG680688 |
| <i>Mosannona hypoglauca</i> (Standl.) Chatrou                               | Herrera 923 (U)        | Panama     | MG680707    | MG680671    | MG680722    | MG680699         | MG680715         | —            | MG680729     | —                 | —                    | MG680689 |
| <i>Mosannona pacifica</i> Chatrou                                           | Maas 8531 (U)          | Ecuador    | AY743506    | MG680672    | AY743513    | MG680700         | AY841482         | —            | AY743499     | —                 | MG680655<br>MG680664 | MG680690 |
| <i>Mosannona papillosa</i> Chatrou                                          | Pitman s.n (U)         | Ecuador    | AY743507    | MG680673    | AY743514    | MG680701         | AY841483         | —            | AY743500     | —                 | MG680656<br>MG680665 | MG680691 |
| <i>Mosannona parva</i> Chatrou                                              | Chatrou 23 (U)         | Peru       | MG680708    | —           | MG680723    | —                | MG680716         | —            | MG680730     | —                 | —                    | MG680692 |
| <i>Mosannona raimondii</i> (Diels) Chatrou                                  | Morawetz 1828985 (U)   | Peru       | MG680709    | —           | MG680724    | —                | MG680717         | —            | MG680731     | —                 | —                    | MG680693 |
| <i>Mosannona</i> sp.                                                        | Chatrou 71 (U)         | Costa Rica | AY743502    | —           | AY743509    | —                | AY841478         | —            | AY743495     | —                 | —                    | MG680682 |
| <i>Mosannona vasquezii</i> Chatrou                                          | Chatrou 226 (U)        | Peru       | AY743508    | MG680674    | AY743515    | MG680702         | AY841484         | —            | AY743501     | —                 | MG680657<br>MG680666 | MG680694 |
| <i>Mosannona xanthochlora</i> (Diels) Chatrou                               | Baker 6799 (U)         | Ecuador    | —           | MG680675    | —           | —                | MG680718         | —            | MG680732     | —                 | —                    | —        |

# : Three small fragments of *ndhF* for *M. depressa* subsp. *abscondita* were included in the analyses, but were too small to be given GenBank accession numbers.
