# Supplementary material for: Parallel diversifications of Cremastosperma and Mosannona (Annonaceae), tropical rainforest trees tracking Neogene upheaval of South America
Source: PubMed Central journal article supplement (PMC5792937; doi:10.1098/rsos.171561), 2018-01-31
Supplement: rsos171561supp4.pdf [file rsos171561supp4.pdf]

Appendix 3: The eight independent climate layers and ten independent soil variable layers used for species distribution modelling.

| Bioclim variable | Explanation                                               |
|------------------|-----------------------------------------------------------|
| BIO1             | Annual Mean Temperature                                   |
| BIO2             | Mean Diurnal Range (Mean of monthly (max temp - min temp) |
| BIO4             | Temperature Seasonality (standard deviation * 100)        |
| BIO10            | Mean Temperature of Warmest Quarter                       |
| BIO14            | Precipitation of Driest Month                             |
| BIO16            | Precipitation of Wettest Quarter                          |
| BIO18            | Precipitation of Warmest Quarter                          |
| BIO19            | Precipitation of Coldest Quarter                          |

| FAO variable | Explanation                    |
|--------------|--------------------------------|
| BS_S         | Base Saturation                |
| CE_T         | Cation Exchange Capacity Soil  |
| CN_T         | Carbon Nitrogen Ratio Top Soil |
| CP_S         | Carbon Pool Soil               |
| Depth        | Soil Depth                     |
| Drain        | Soil Drainage Class            |
| NN_T         | Nitrogen % Top Soil            |
| SMAX         | Soil Moisture capacity         |
| Soil_prod    | Soil production                |
| Soil_text    | Top Soil texture               |
